# Supplementary material
Source: ML conference proceedings conference paper supplement (https://openaccess.thecvf.com/content/CVPR2026/html/Li_DeepScan_A_Training-Free_CVPR_2026_paper.html)

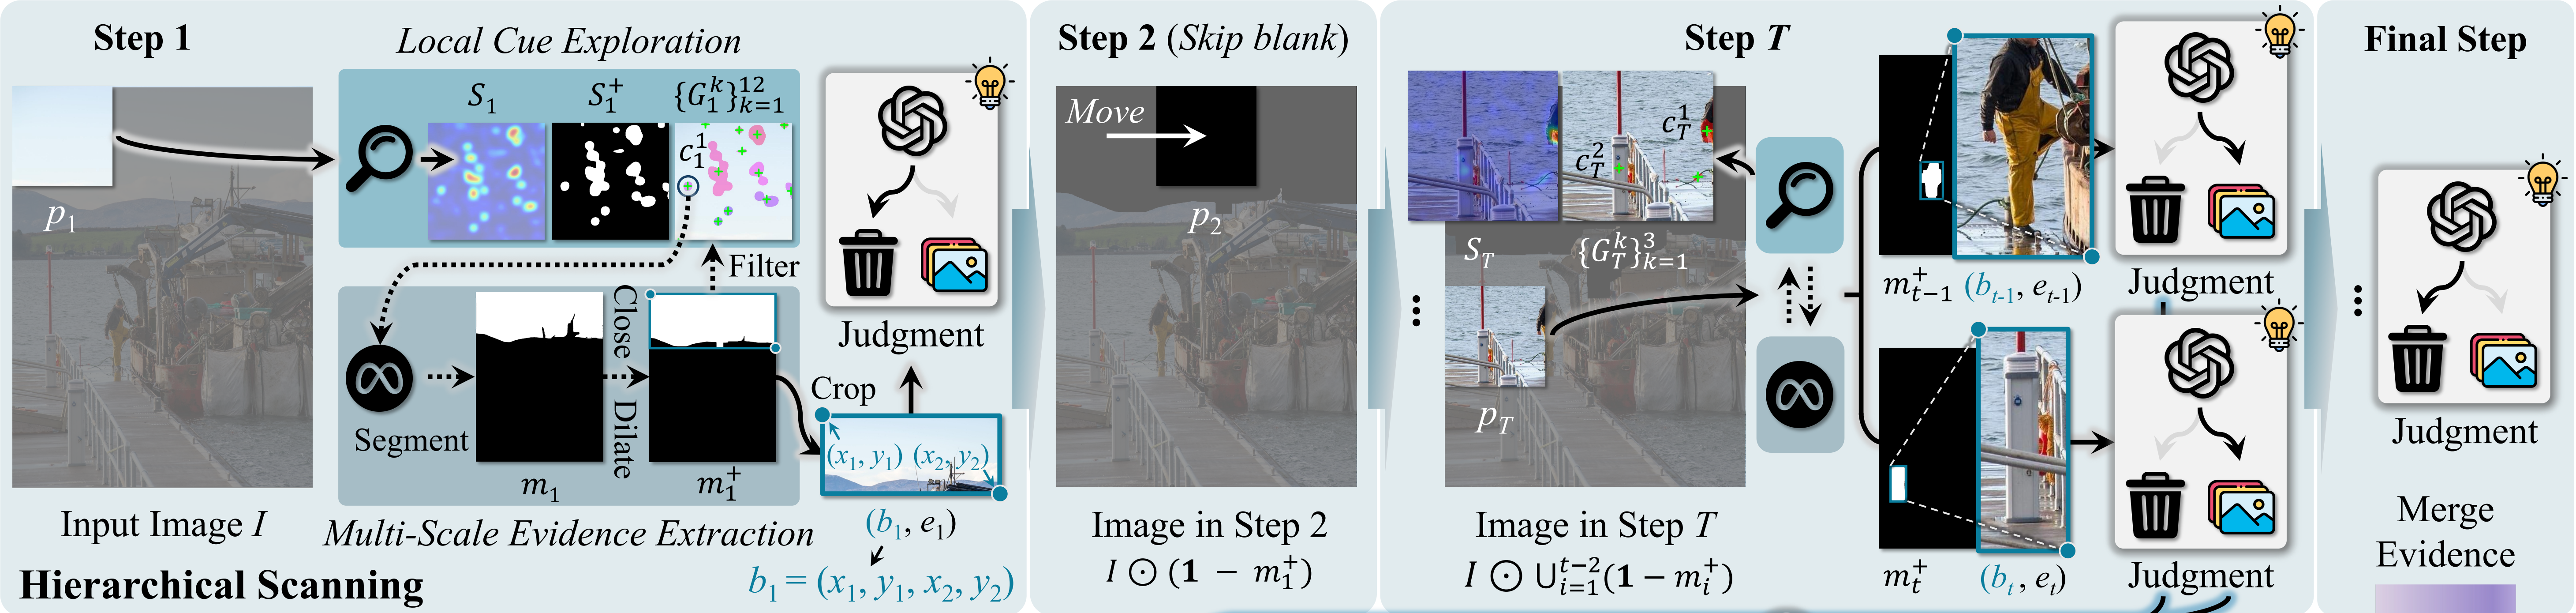

**Question:** From the perspective of man wearing a black jacket and yellow waterproof, in which direction is the dock utility box (a white box with blue accents) relative to the man?

**Answer:** Based on the evidence, the man faces a boat, while the white pillar with blue fittings sits along the dock rail shore-side, behind his right shoulder line. So, from his perspective, the utility box is to his right, slightly behind.

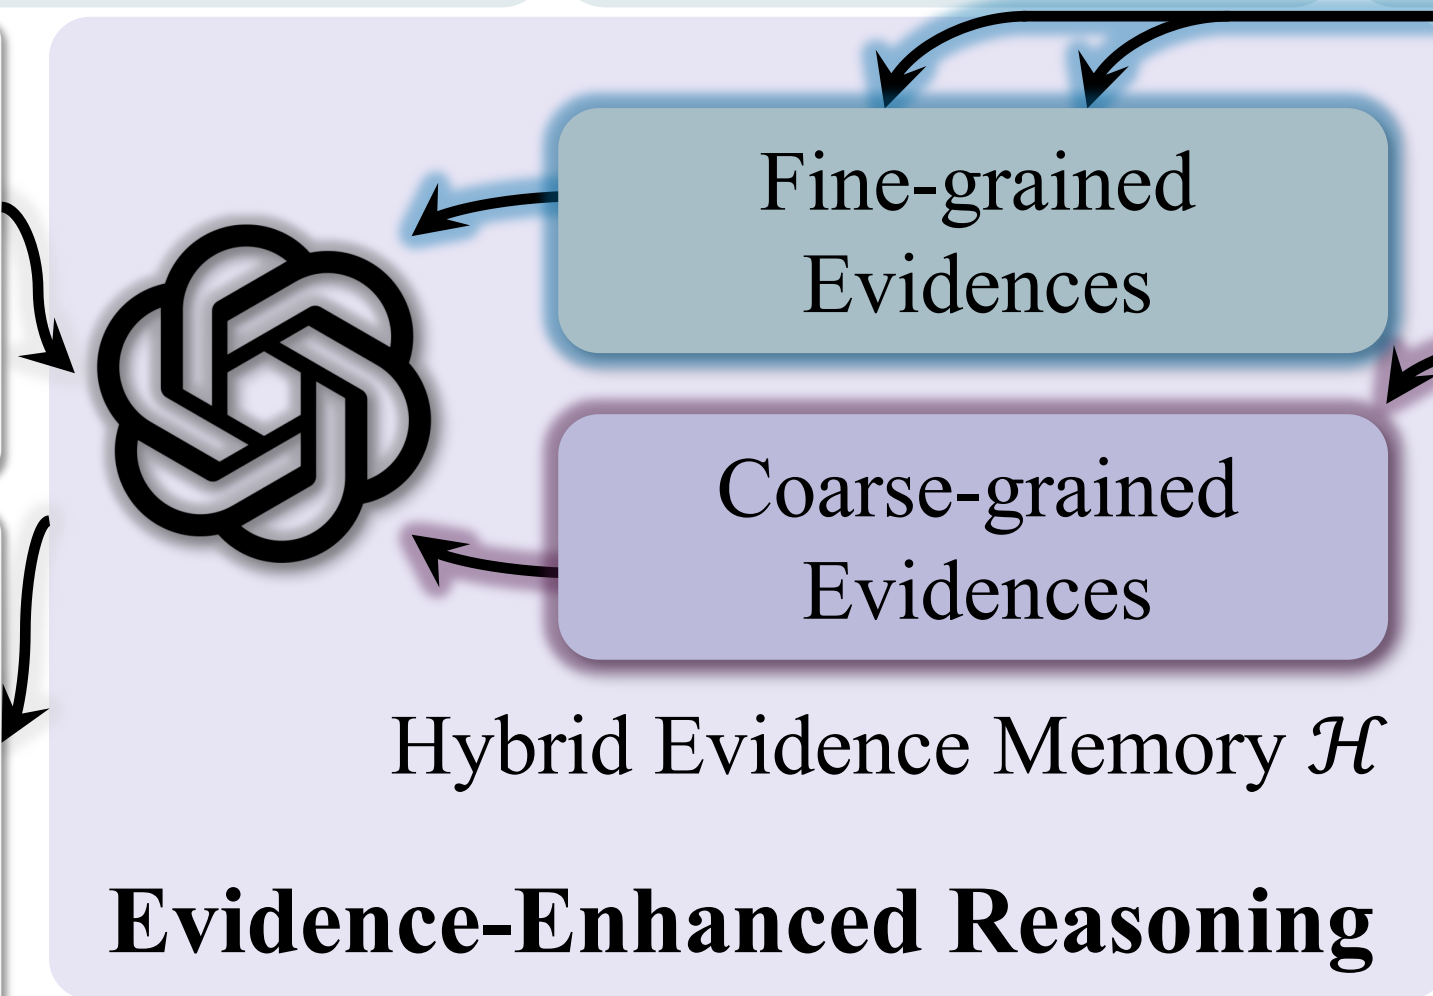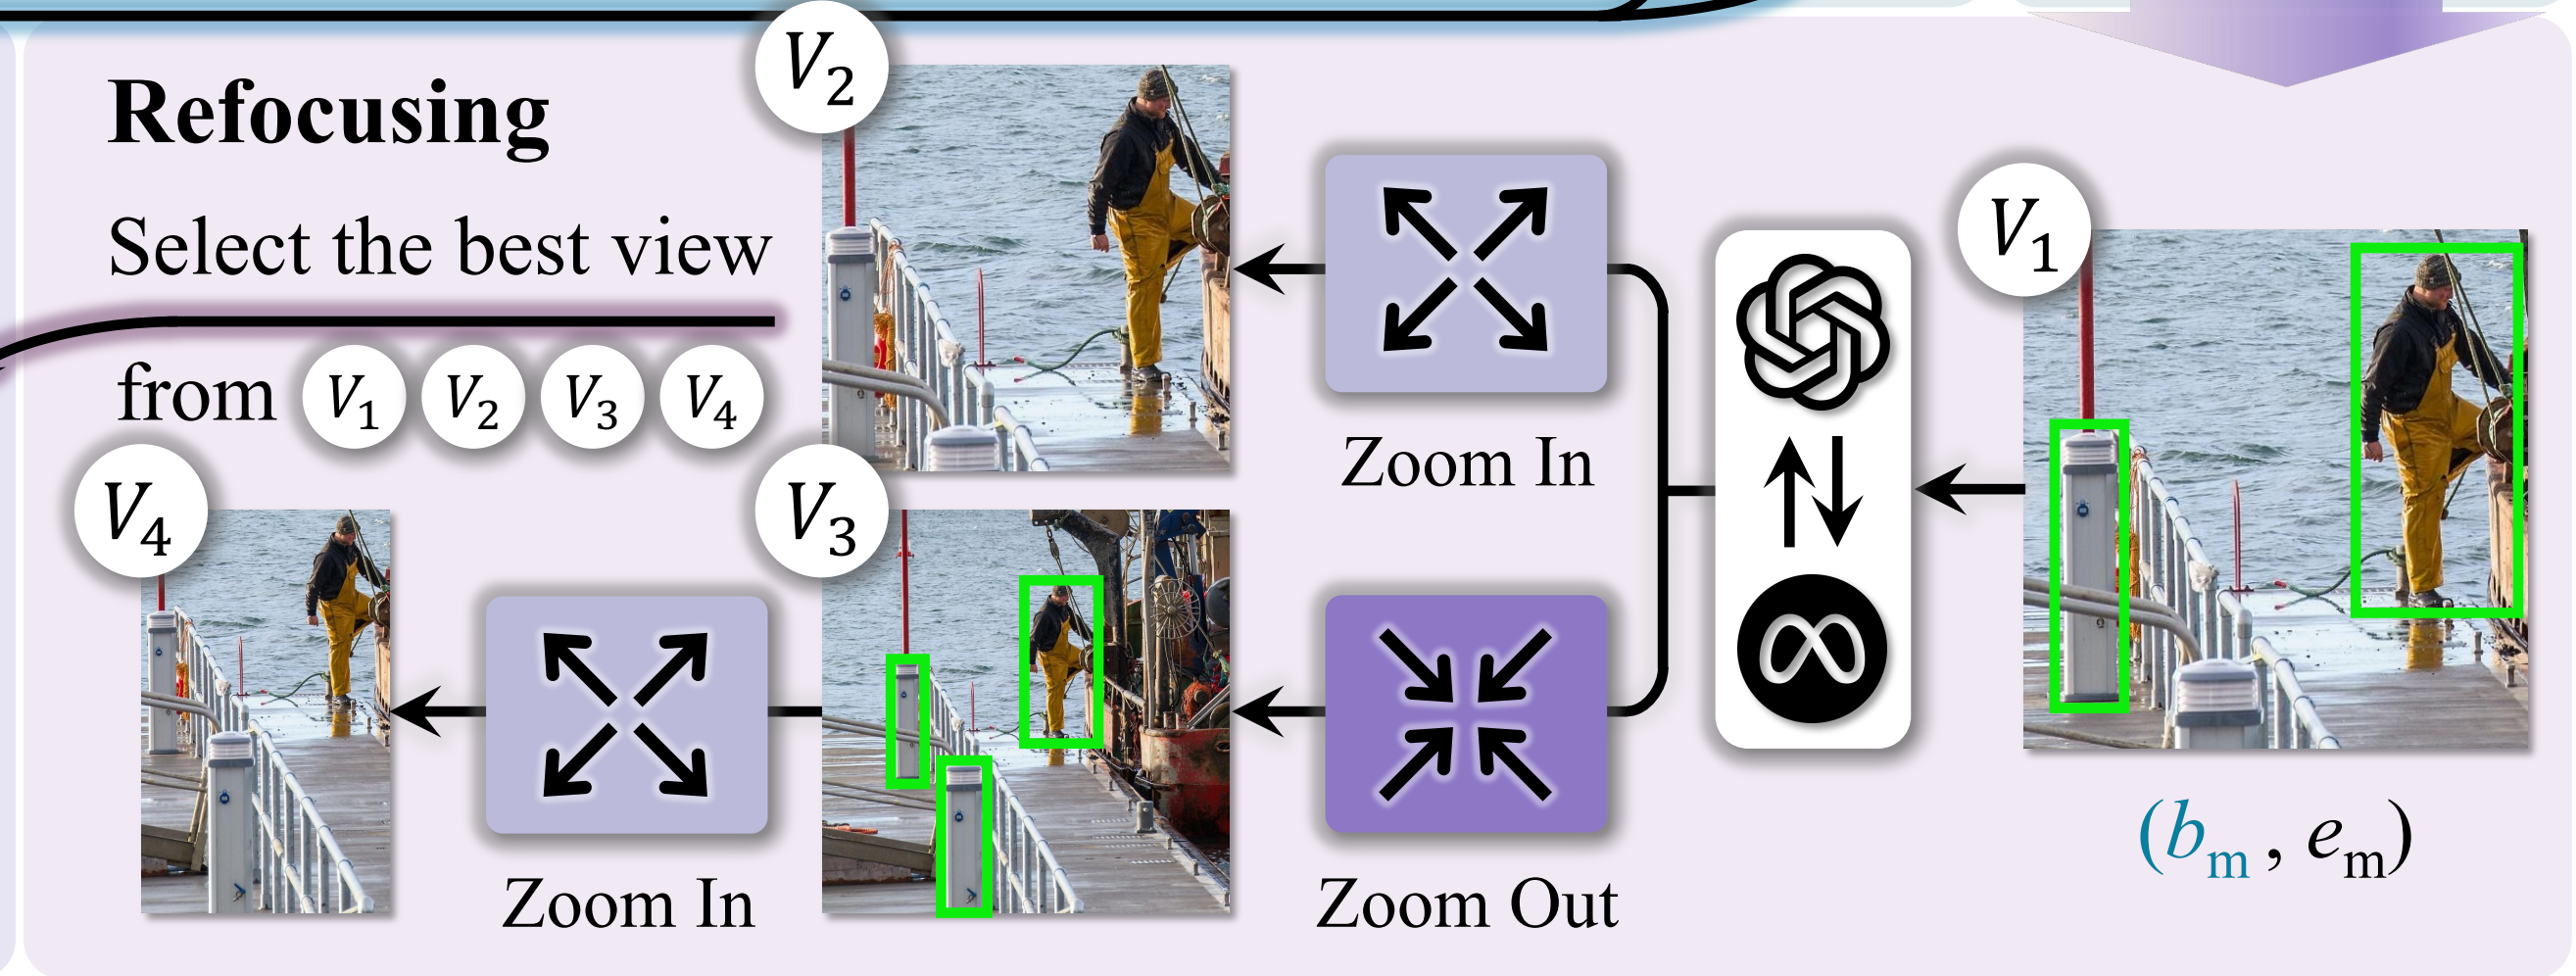

Supplement: Supplementary file 2 [file model.pdf › DeepScan-main/figs/model.pdf]
