# Supplementary material
Source: ML conference proceedings conference paper supplement (https://openaccess.thecvf.com/content/CVPR2026/html/Li_DeepScan_A_Training-Free_CVPR_2026_paper.html)
Supplement: Supplementary file 3 [file sample.pdf › DeepScan-main/figs/sample.pdf]

**Question:** What is the color of the cyclist's box?

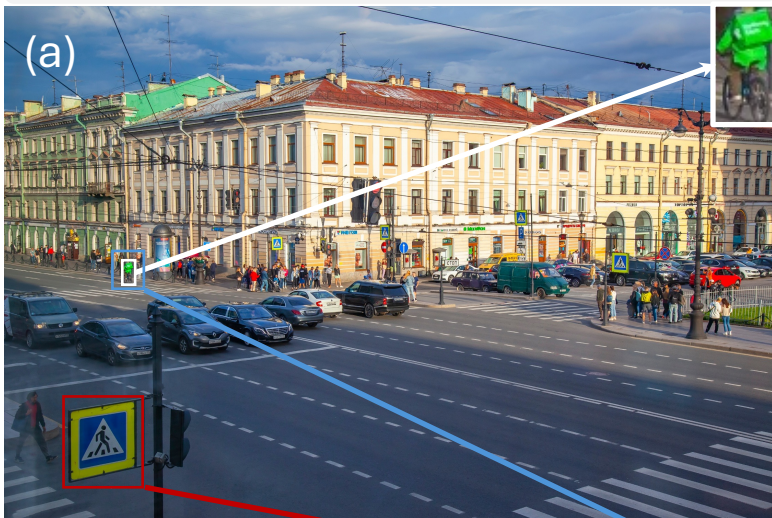

**GPT-4o**  
There is a cyclist's box positioned **in front of the cars, near the crossing**. The box is clearly filled with a distinct **yellow** color.

**Dyfo**  
The cyclist's box is **yellow**

**Ours**  
The cyclist's box is **light green**.

**Question:** What is the color of the trash can?

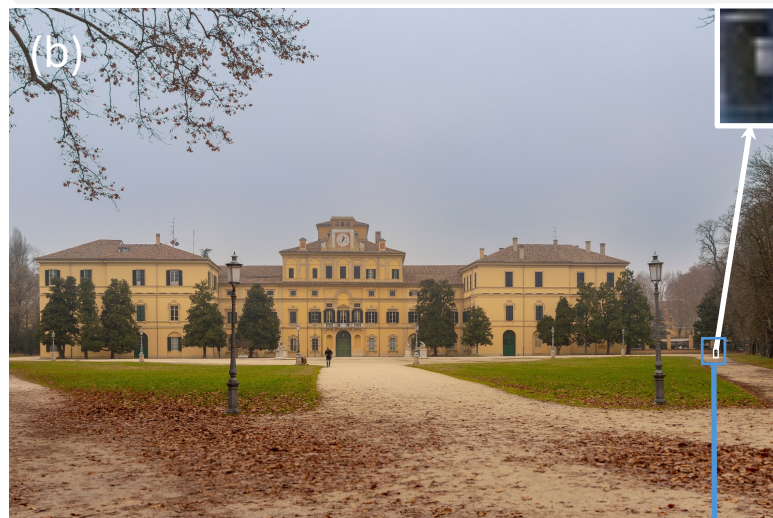

**GPT-4o**  
On the **left side** of the image, **near the yellow building**, there is a **dark green** trash can visible.

**Dyfo**  
The trash can in the picture is **green**.  
**Search Failed**

**Ours**  
The trash can in the picture is **clear black**.

**Question:** From the perspective of the building with the text "Camara Municipal", in which direction is the road sign with the text "Titan" to the entrance of the building?

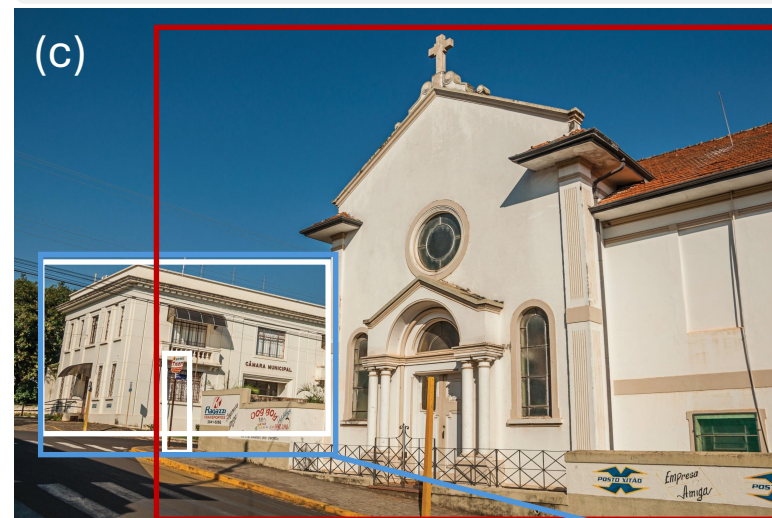

**GPT-4o**  
From the perspective of the building, the road sign with the text "Titan" is located **to the left of the entrance** of that building.

**Dyfo**  
The road sign is to the **left** of the entrance of the building.

**Ours**  
The road sign with the text "Titan" is to the **front right** of the building.

**Question:** A construction crane stands beside a low rooftop that displays a large word in block letters. What are the last four letters of the word on that rooftop sign?

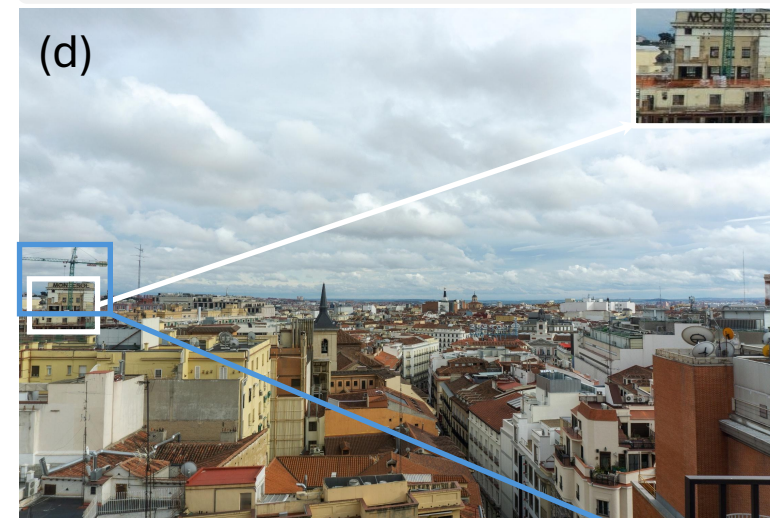

**GPT-4o**  
The full visible word appears to be **"STADIUM"**. The last four letters of the word on the rooftop sign are **"DIUM"**.

**Dyfo**  
The last four letters of the word on this sign are **"SOLE"**.  
**Search Failed**

**Ours**  
The word is **"MOESOL"**, and the last four letters are **"ESOL"**.
