# Supplementary material
Source: ML conference proceedings conference paper supplement (https://openaccess.thecvf.com/content/CVPR2026/html/Li_DeepScan_A_Training-Free_CVPR_2026_paper.html)
Supplement: Supplementary file 4 [file teaser.pdf › DeepScan-main/figs/teaser.pdf]

Q: What number is on the shirt of the beaver *with ear tufts*?

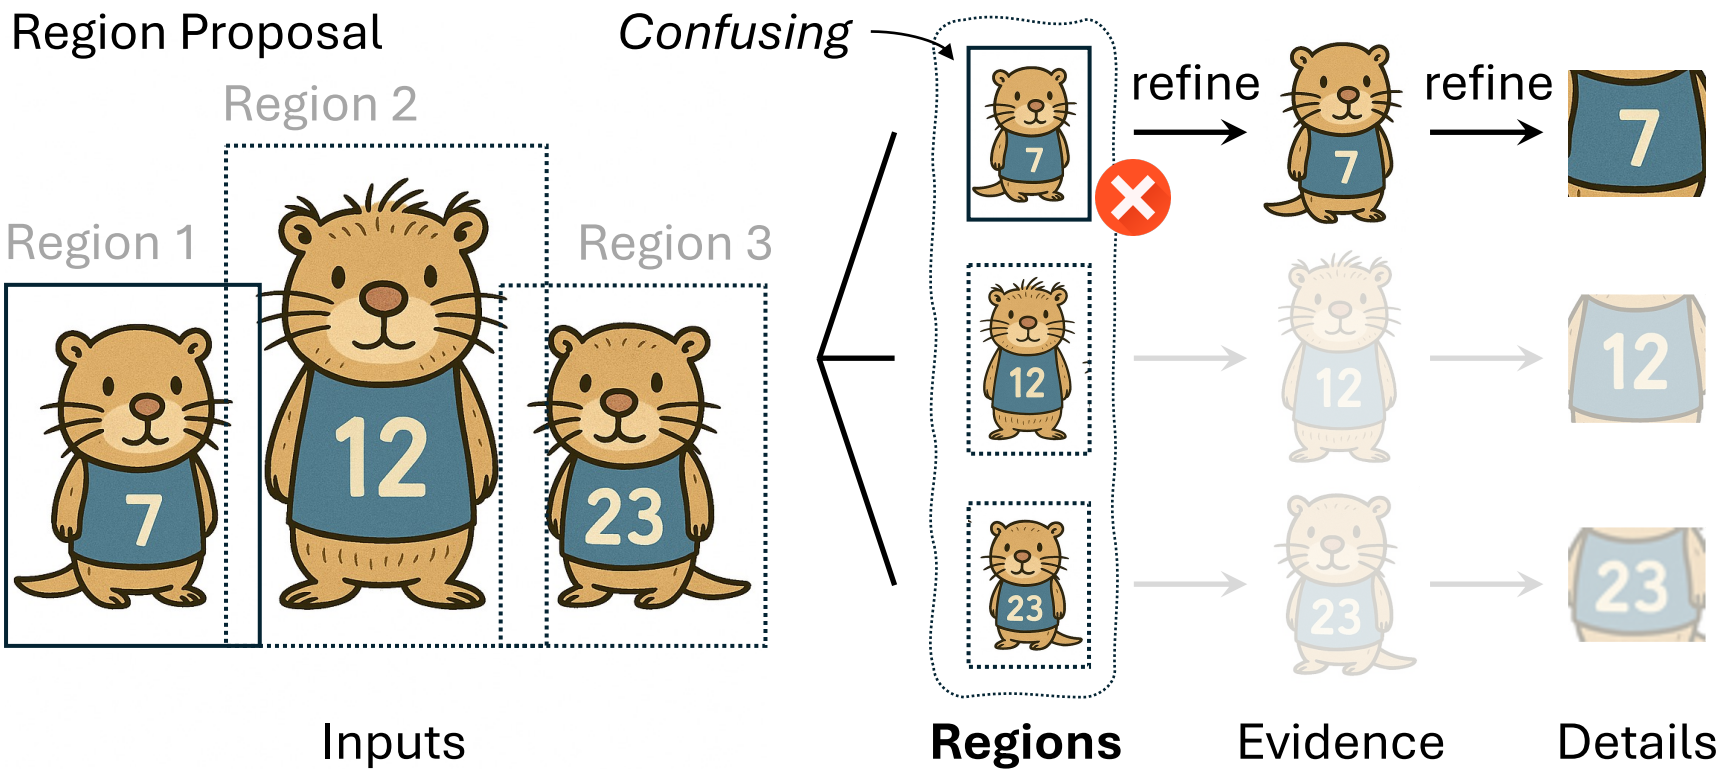

(a) Conventional **coarse-to-fine** pipeline

Q: What number is on the shirt of the beaver *with ear tufts*?

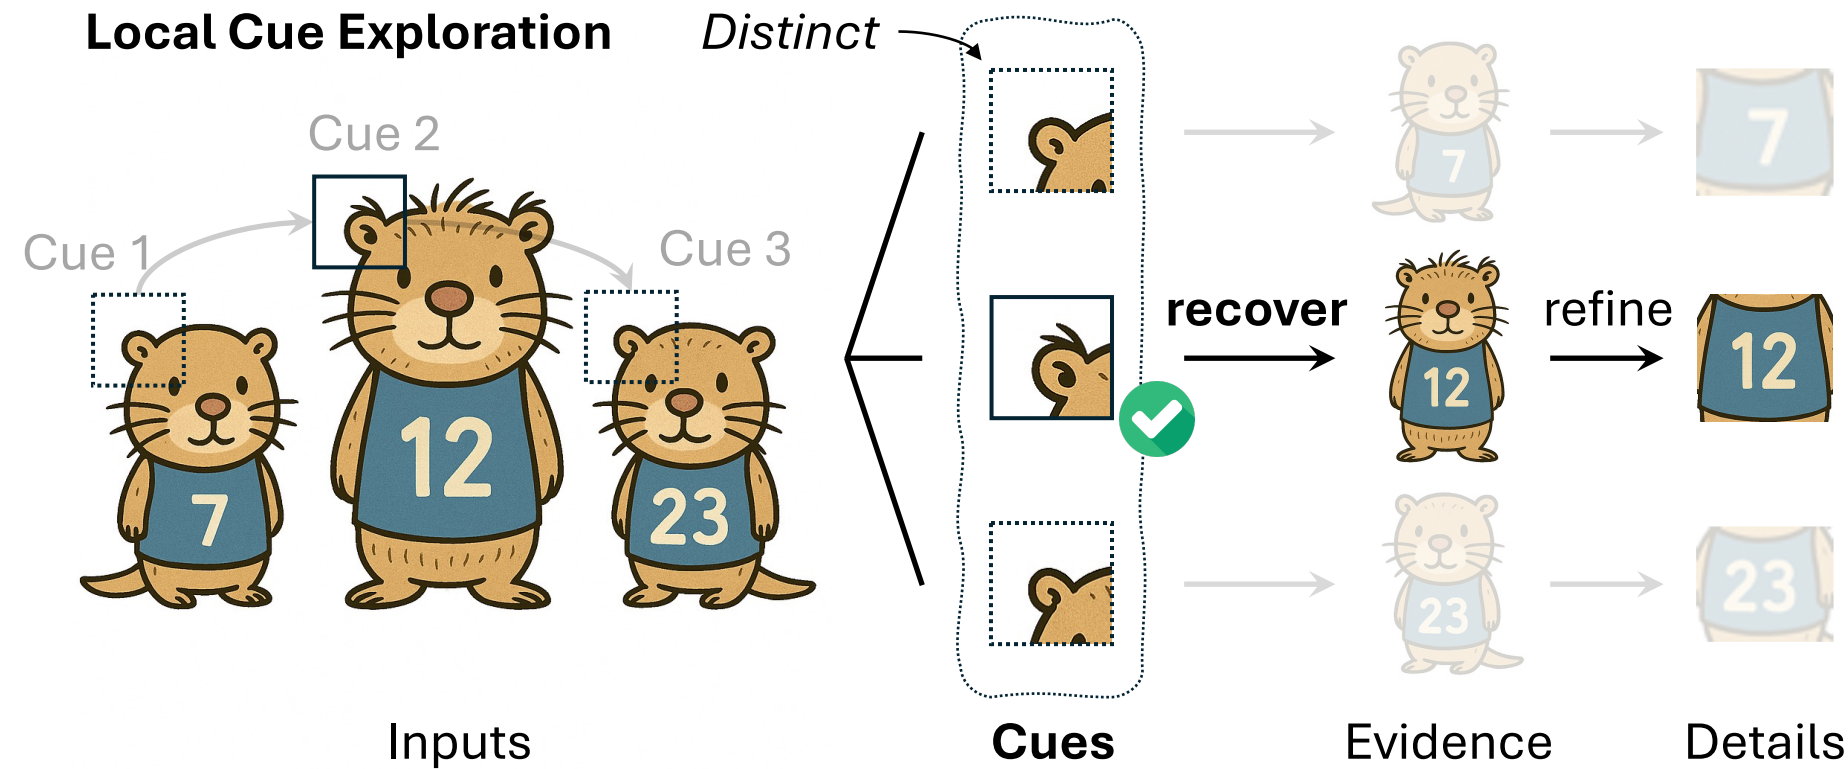

(b) The proposed **DeepScan** pipeline
