# Supplementary material
Source: ML conference proceedings conference paper supplement (https://openaccess.thecvf.com/content/CVPR2026/html/Li_DeepScan_A_Training-Free_CVPR_2026_paper.html)

# Accuracy (%) on V\* Benchmark

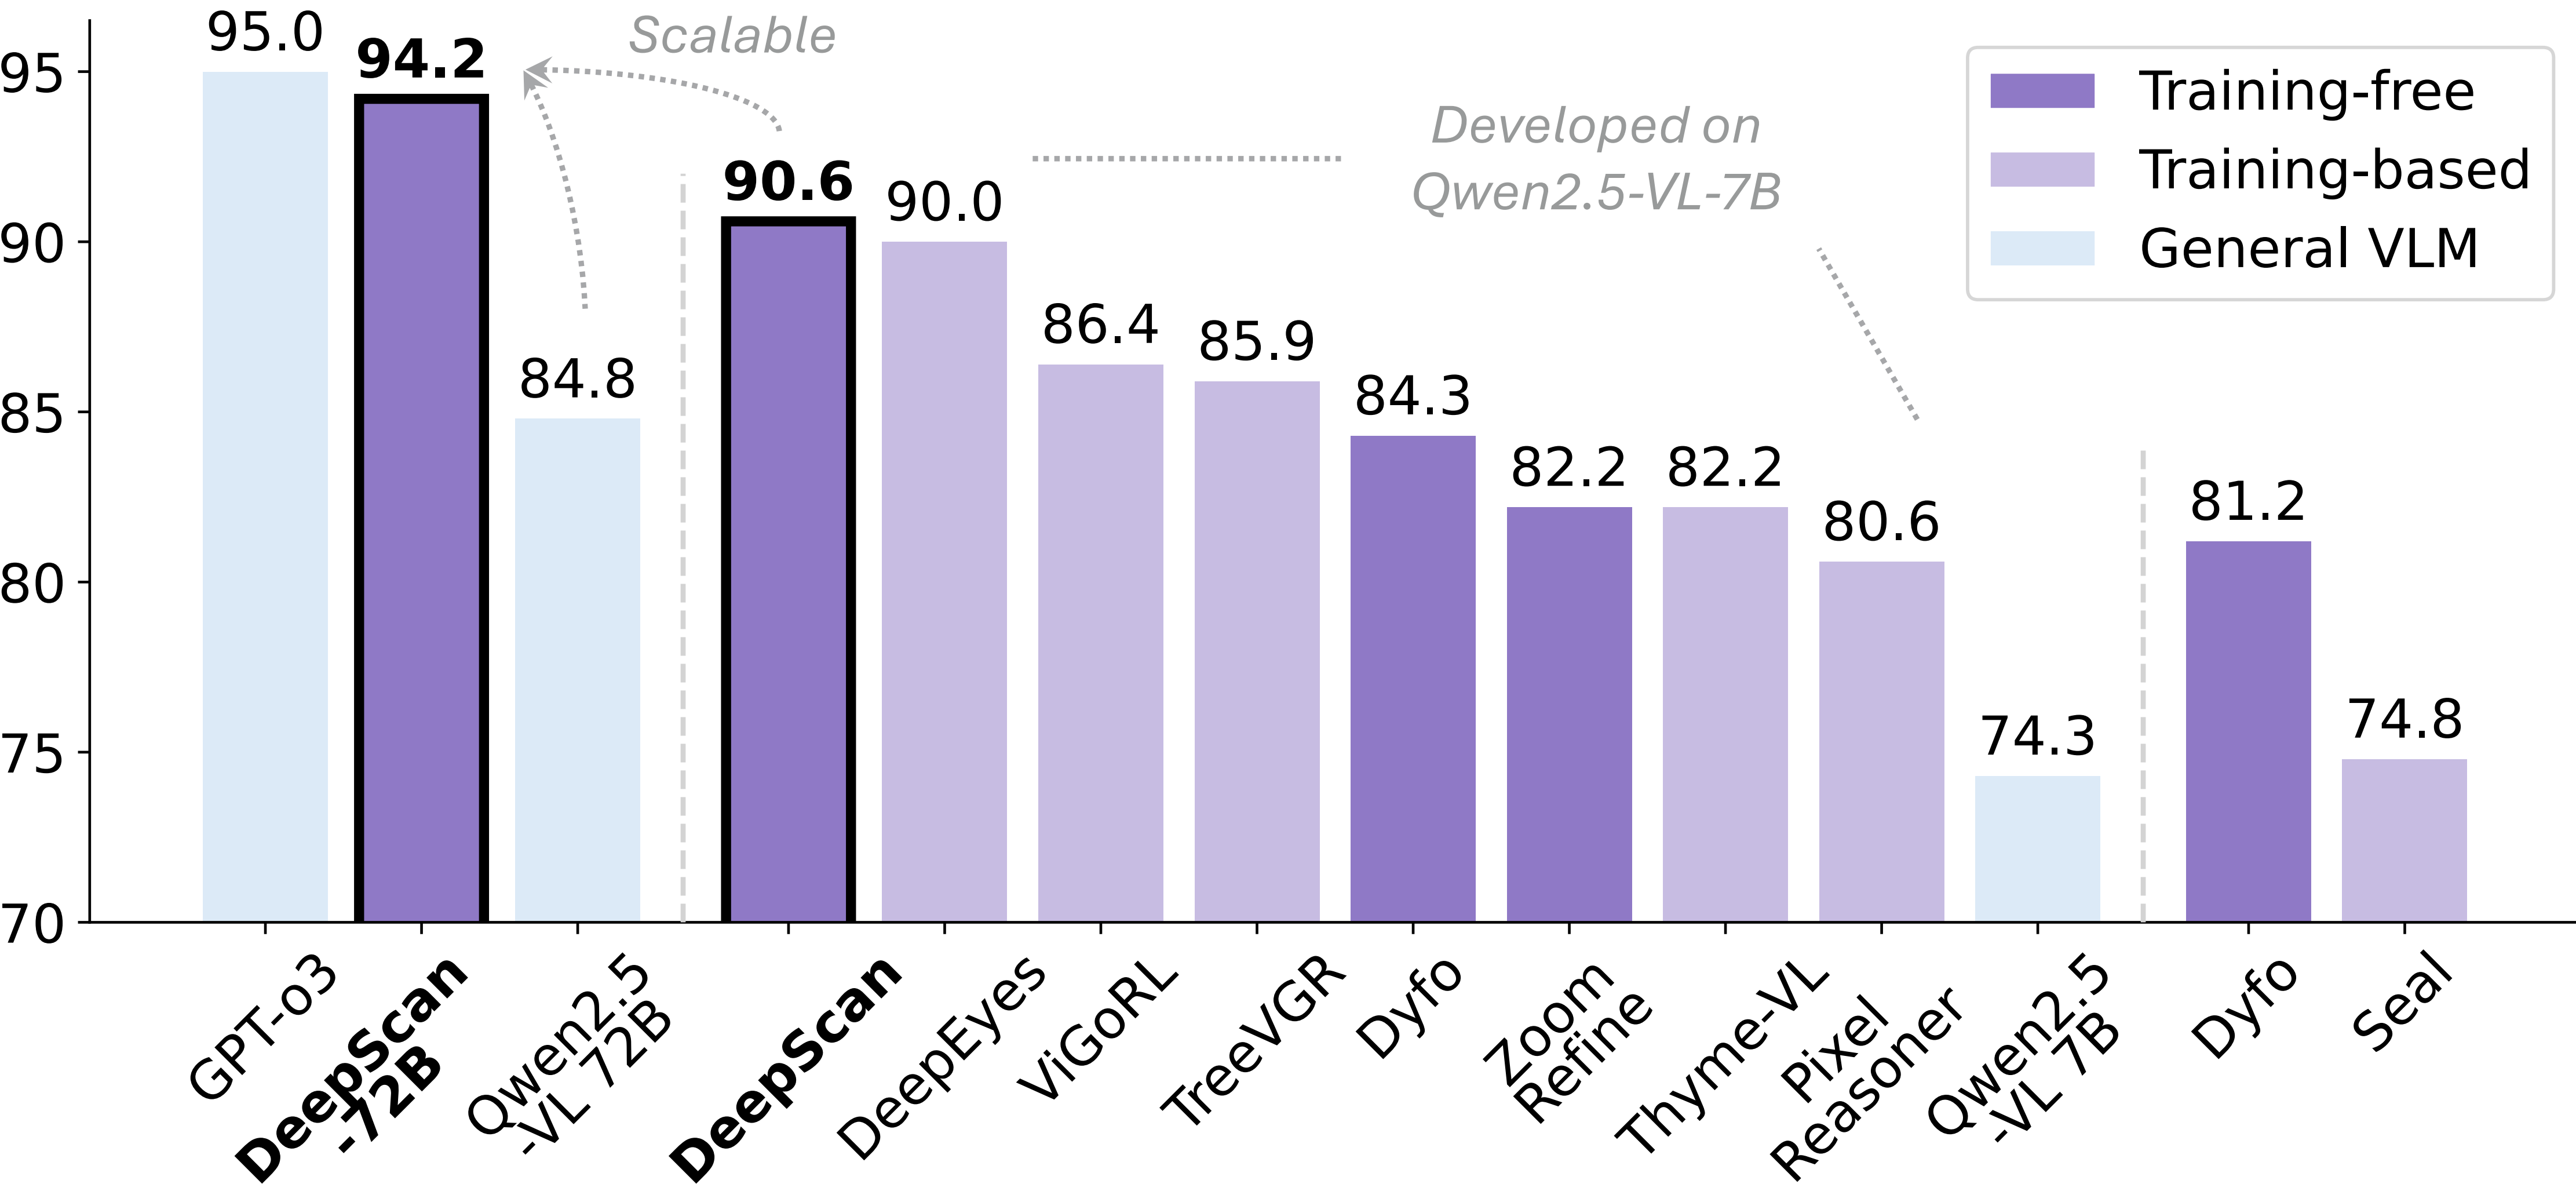

Supplement: Supplementary file 5 [file vstar.pdf › DeepScan-main/figs/vstar.pdf]
